# Supplementary material
Source: MDPI journal article supplement (https://www.mdpi.com/2077-0472/14/1/48)
Supplement: s1 [file s1]

**Supplementary Table S1.** Somatic hybrids and backcross progenies selected for the assay of drought tolerance and their resistance to late blight in detached leaf assay (DLA), in a field ( $\Delta$  rAUDPC) and results of resistance genes presence by using specific molecular markers (Rakosy-Tican et al. 2020); ND – not determined yet; SH – somatic hybrid; BC – back-cross; minus values of ( $\Delta$  rAUDPC) indicate resistance; DLA on a scale from 1 to 9 where 1 is the most resistant.

| Name                                   | DLA                | Field resistance<br>( $\Delta$ rAUDPC) | Resistant genes                                           |
|----------------------------------------|--------------------|----------------------------------------|-----------------------------------------------------------|
| <b><i>S. bulbocastanum</i></b>         | 1.0; 1.0; 1.0; 1.0 | -0.124; -0.405                         | <i>Rpi blb1</i> and <i>blb3</i> ; <i>R3a</i> , <i>R3b</i> |
| <b><i>S. tuberosum</i> cv. Delikat</b> | 5.0; 5.4; 5.8; 4.2 | 0.112                                  | None                                                      |
| <b>SH 82/4</b>                         | 1.5; 1.1; 1.6; 1.0 | -0.352                                 | <i>Rpi blb1</i> and <i>blb3</i> ; <i>R3a</i> , <i>R3b</i> |
| <b>SH 84/4</b>                         | ND                 |                                        |                                                           |
| <b>SH 84/5</b>                         | ND                 |                                        |                                                           |
| <b>SH 83/9</b>                         | 1.4; 1.0; 1.0; 1.8 | -0.324; +0.131                         | <i>Rpi blb1</i> and <i>blb3</i> ; <i>R3a</i> , <i>R3b</i> |
| <b>SH 94/5</b>                         | 1.8; 1.8; 2.0      | +0.098; +0.235                         | <i>Rpi blb1</i>                                           |
| <b>SH 95/1</b>                         | 1.2; 1.8; 2.8      | +0.084                                 | <i>Rpi blb1</i> and <i>blb3</i> ; <i>R3a</i> , <i>R3b</i> |
| <b>SH 99/2</b>                         | 1.1; 1.0; 1.0; 1.4 | -0.293; -0.087; +0.023                 | <i>Rpi blb1</i> and <i>blb3</i> ;                         |
| <b>BC<sub>1</sub> 82/4/4</b>           | 2.2; 1.0           | ND                                     | <i>Rpi blb1</i>                                           |
| <b>BC<sub>1</sub> 82/4/68</b>          | 1.8; 1.4; 3.2; 5.4 | -0.145                                 | <i>Rpi blb1</i> and <i>blb3</i> ; <i>R3a</i>              |
| <b>BC<sub>1</sub> 83/9/3</b>           | 1.6; 1.6; 1.0      | +0.223                                 | <i>Rpi-blb1</i> , <i>R3a</i> , <i>R3b</i>                 |
| <b>BC<sub>1</sub> 83/9/27</b>          | ND                 | ND                                     | <i>Rpi-blb1</i>                                           |
| <b>BC<sub>1</sub> 83/9/63</b>          | 2.4; 1.6; 1.6      | -0.103                                 | <i>Rpi-blb1</i> and <i>blb3</i> ; <i>R3a</i> , <i>R3b</i> |
| <b>BC<sub>1</sub> 83/9/64</b>          | ND                 | ND                                     | <i>Rpi-blb3</i>                                           |
| <b>BC<sub>1</sub> 94/5/5</b>           | 3.6; 2.2; 3.6; 4.6 | ND                                     | ND                                                        |
| <b>BC<sub>1</sub> 95/1/7</b>           | 1.4                | +0.045                                 | <i>Rpi blb1</i> and <i>blb3</i> ; <i>R3a</i> , <i>R3b</i> |
| <b>BC<sub>2</sub> 82/4/68/22</b>       | 1.2; 1.6; 2.6; 3.0 | ND                                     | <i>Rpi blb1</i>                                           |
| <b>BC<sub>2</sub> 95/1/4/11</b>        | 1.4; 1.0; 2.2; 1.0 | -0.138                                 | <i>R3a</i> , <i>R3b</i>                                   |
| <b>BC<sub>2</sub> 95/1/4/59</b>        | 1.8; 1.4; 1.0; 2.6 | +0.147                                 | <i>Rpi blb1</i> , <i>R3a</i> , <i>R3b</i>                 |
